# Supplementary material for: Diabetic Neuropathy: A cross-sectional study of the relationships among tests of neurophysiology
Source: PubMed Central journal article supplement — Diabetes Care. 2010 Aug 30;33(12):2629–34. doi: 10.2337/dc10-0763 (PMC2992203; doi:10.2337/dc10-0763), 2010-08-30
Supplement: supp_dc10-0763_dc100763onlineappendix.pdf [file supp_dc10-0763_dc100763onlineappendix.pdf]

**Online Appendix Table 1: Correlations with Autonomic Testing**

|                               | Phase 2<br>Valsalva<br>BP | Valsalva<br>Ratio | Heart Rate<br>Variability | Phase 4<br>Valsalva<br>BP | Fall in<br>SBP on<br>Tilt | Fall in<br>DBP on<br>Tilt |
|-------------------------------|---------------------------|-------------------|---------------------------|---------------------------|---------------------------|---------------------------|
| <b>Autonomic Tests</b>        |                           |                   |                           |                           |                           |                           |
| Phase 2 Valsalva BP           | 1                         | 0.20              | 0.36                      | <b>0.50</b>               | -0.27                     | -0.10                     |
| Valsalva Ratio                | 0.20                      | 1                 | <b>0.64</b>               | 0.19                      | -0.30                     | -0.05                     |
| Heart Rate Variability        | 0.36                      | <b>0.64</b>       | 1                         | 0.24                      | -0.10                     | -0.01                     |
| Phase 4 Valsalva BP           | <b>0.50</b>               | 0.19              | 0.24                      | 1                         | -0.14                     | -0.01                     |
| Fall in SBP on Tilt           | -0.27                     | -0.30             | -0.10                     | -0.14                     | 1                         | <b>0.44</b>               |
| Fall in DBP on Tilt           | -0.10                     | -0.05             | -0.01                     | -0.01                     | <b>0.44</b>               | 1                         |
| <b>Nerve Conductions</b>      |                           |                   |                           |                           |                           |                           |
| Peroneal Amplitude            | 0.38                      | <b>0.41</b>       | 0.39                      | 0.29                      | -0.29                     | -0.08                     |
| Peroneal Velocity             | 0.19                      | 0.32              | 0.28                      | 0.20                      | <b>-0.36</b>              | -0.04                     |
| Sural Amplitude               | 0.16                      | <b>0.52</b>       | 0.42                      | 0.19                      | 0.40                      | -0.16                     |
| Sural Velocity                | 0.08                      | <b>0.32</b>       | 0.28                      | 0.09                      | -0.23                     | -0.02                     |
| Peroneal Distal Latency       | -0.15                     | -0.21             | <b>-0.22</b>              | -0.11                     | 0.04                      | 0.02                      |
| <b>Sensory Testing</b>        |                           |                   |                           |                           |                           |                           |
| Monofilament Right            | -0.37                     | <b>-0.38</b>      | -0.30                     | -0.26                     | 0.35                      | -0.03                     |
| Vibration Detection Toe       | -0.32                     | -0.30             | <b>-0.36</b>              | -0.23                     | 0.18                      | -0.07                     |
| Vibration Detection Hand      | -0.19                     | -0.17             | -0.20                     | <b>-0.21</b>              | 0.11                      | -0.01                     |
| Cold-Pain Foot                | <b>0.32</b>               | 0.03              | 0.09                      | 0.21                      | -0.19                     | 0.04                      |
| Cold-Pain Hand                | <b>0.13</b>               | -0.06             | -0.08                     | 0.10                      | -0.11                     | -0.03                     |
| Cold Detection Foot           | 0.27                      | 0.36              | 0.27                      | <b>0.44</b>               | -0.30                     | 0.03                      |
| Cold Detection Hand           | -0.04                     | 0.04              | 0.03                      | <b>0.08</b>               | -0.03                     | 0.01                      |
| Heat-Pain Foot                | -0.21                     | -0.22             | -0.24                     | -0.21                     | <b>0.27</b>               | 0.06                      |
| Heat-Pain Hand                | -0.10                     | -0.07             | -0.01                     | <b>-0.18</b>              | 0.13                      | 0.07                      |
| Heat Detection Foot           | -0.15                     | <b>-0.43</b>      | -0.37                     | -0.24                     | 0.29                      | 0.06                      |
| Heat Detection Hand           | -0.11                     | <b>-0.34</b>      | -0.29                     | -0.32                     | 0.12                      | -0.08                     |
| <b>Cutaneous Blood Flow</b>   |                           |                   |                           |                           |                           |                           |
| Direct Blood Flow Arm         | 0.03                      | <b>0.22</b>       | 0.15                      | 0.05                      | -0.18                     | -0.12                     |
| Direct Blood Flow Leg         | 0.21                      | <b>0.28</b>       | 0.16                      | 0.10                      | -0.09                     | -0.10                     |
| Axon Reflex Blood Flow<br>Arm | 0.01                      | 0.01              | 0.03                      | 0.11                      | -0.03                     | <b>-0.04</b>              |
| Axon Reflex Blood Flow<br>Leg | 0.11                      | <b>0.27</b>       | 0.14                      | 0.10                      | -0.11                     | -0.12                     |

This table highlights the relationships within and between the different testing modalities compared to autonomic testing. The following autonomic tests are performed: The blood pressure response to phase 2 and phase 4 of the Valsalva maneuver. The heart rate Valsalva ratio, the heart rate response to deep breathing and the systolic blood pressure (SBP) and diastolic blood pressure (DBP) drop during 10 minutes of upright tilt table testing. The largest correlation in each row is shown in bold.

**Online Appendix Table 2: Correlations with Nerve Conduction Studies**

|                               | Peroneal<br>Amplitude | Peroneal<br>Velocity | Sural<br>Amplitude | Sural<br>Velocity | Peroneal<br>Distal<br>Latency |
|-------------------------------|-----------------------|----------------------|--------------------|-------------------|-------------------------------|
| <b>Autonomic Tests</b>        |                       |                      |                    |                   |                               |
| Phase 2 Valsalva BP           | <b>0.38</b>           | 0.19                 | 0.16               | 0.08              | -0.15                         |
| Valsalva Ratio                | 0.41                  | 0.32                 | <b>0.52</b>        | 0.32              | -0.21                         |
| Heart Rate Variability        | 0.39                  | 0.28                 | <b>0.42</b>        | 0.28              | -0.22                         |
| Phase 4 Valsalva BP           | 0.29                  | 0.20                 | 0.19               | 0.09              | -0.11                         |
| Fall in SBP on Tilt           | -0.29                 | -0.36                | <b>-0.40</b>       | -0.23             | 0.04                          |
| Fall in DBP on Tilt           | -0.08                 | -0.04                | <b>-0.16</b>       | -0.02             | 0.02                          |
| <b>Nerve Conductions</b>      |                       |                      |                    |                   |                               |
| Peroneal Amplitude            | 1                     | <b>0.50</b>          | 0.51               | 0.37              | -0.45                         |
| Peroneal Velocity             | <b>0.50</b>           | 1                    | 0.48               | 0.48              | -0.43                         |
| Sural Amplitude               | 0.51                  | 0.48                 | 1                  | <b>0.73</b>       | -0.18                         |
| Sural Velocity                | 0.37                  | 0.48                 | <b>0.73</b>        | 1                 | -0.19                         |
| Peroneal Distal Latency       | <b>-0.45</b>          | -0.43                | -0.18              | -0.19             | 1                             |
| <b>Sensory Testing</b>        |                       |                      |                    |                   |                               |
| Monofilament Right            | -0.41                 | -0.34                | <b>-0.44</b>       | -0.35             | 0.23                          |
| Vibration Detection Toe       | -0.27                 | -0.25                | -0.28              | <b>-0.29</b>      | 0.12                          |
| Vibration Detection Hand      | <b>-0.18</b>          | -0.01                | -0.16              | -0.13             | -0.04                         |
| Cold-Pain Foot                | 0.17                  | <b>0.21</b>          | 0.14               | 0.03              | -0.05                         |
| Cold-Pain Hand                | 0.02                  | 0.04                 | -0.04              | -0.09             | <b>0.13</b>                   |
| Cold Detection Foot           | <b>0.29</b>           | 0.21                 | <b>0.29</b>        | 0.19              | -0.14                         |
| Cold Detection Hand           | -0.06                 | 0.06                 | <b>0.08</b>        | 0.06              | -0.07                         |
| Heat-Pain Foot                | -0.28                 | -0.30                | <b>-0.32</b>       | -0.30             | 0.10                          |
| Heat-Pain Hand                | -0.01                 | -0.15                | 0.02               | 0.02              | 0.05                          |
| Heat Detection Foot           | -0.38                 | -0.38                | <b>-0.42</b>       | -0.35             | 0.21                          |
| Heat Detection Hand           | -0.30                 | -0.30                | <b>-0.37</b>       | -0.21             | 0.18                          |
| <b>Cutaneous Blood Flow</b>   |                       |                      |                    |                   |                               |
| Direct Blood Flow Arm         | 0.13                  | 0.17                 | <b>0.33</b>        | 0.23              | -0.10                         |
| Direct Blood Flow Leg         | <b>0.23</b>           | 0.17                 | 0.19               | 0.12              | -0.02                         |
| Axon Reflex Blood Flow<br>Arm | 0.01                  | 0.09                 | 0.11               | <b>0.15</b>       | -0.11                         |
| Axon Reflex Blood Flow<br>Leg | <b>0.25</b>           | 0.19                 | 0.24               | 0.17              | -0.09                         |

This table highlights the relationships within and between the different testing modalities compared to nerve conduction study parameters. The largest correlation in each row is shown in bold.

**Online Appendix Table 3: Correlations with Sensory Testing**

|                             | MFR          | VT          | VH    | CPF          | CPH          | CF           | CH    | HPF          | HPH          | HF           | HH           |
|-----------------------------|--------------|-------------|-------|--------------|--------------|--------------|-------|--------------|--------------|--------------|--------------|
| <b>Autonomic Tests</b>      |              |             |       |              |              |              |       |              |              |              |              |
| Phase 2 Valsalva BP         | <b>-0.37</b> | -0.32       | -0.19 | 0.32         | 0.13         | 0.27         | -0.4  | -0.21        | -0.10        | -0.15        | -0.11        |
| Valsalva Ratio              | -0.38        | -0.30       | -0.17 | 0.03         | -0.06        | 0.36         | 0.04  | -0.21        | -0.07        | <b>-0.43</b> | -0.34        |
| Heart Rate Variability      | -0.30        | -0.36       | -0.20 | 0.09         | -0.08        | 0.27         | 0.03  | -0.24        | -0.01        | <b>-0.37</b> | -0.29        |
| Phase 4 Valsalva BP         | -0.26        | -0.23       | -0.21 | 0.21         | 0.10         | <b>0.44</b>  | 0.08  | -0.21        | -0.18        | -0.24        | -0.32        |
| Fall in SBP on Tilt         | <b>0.35</b>  | 0.18        | 0.11  | -0.19        | -0.12        | -0.30        | -0.3  | 0.27         | 0.13         | 0.29         | 0.12         |
| Fall in DBP on Tilt         | -0.03        | -0.06       | -0.01 | 0.04         | -0.03        | 0.03         | 0.01  | 0.05         | 0.07         | 0.04         | <b>-0.08</b> |
| <b>Nerve Conductions</b>    |              |             |       |              |              |              |       |              |              |              |              |
| Peroneal Amplitude          | <b>-0.41</b> | -0.27       | -0.18 | 0.17         | 0.02         | 0.29         | -0.06 | -0.28        | -0.01        | -0.38        | -0.30        |
| Peroneal Velocity           | -0.34        | -0.25       | -0.01 | 0.21         | 0.04         | 0.21         | 0.06  | -0.30        | -0.15        | <b>-0.38</b> | -0.30        |
| Sural Amplitude             | <b>-0.44</b> | -0.28       | -0.16 | 0.14         | -0.04        | 0.29         | 0.08  | -0.32        | 0.02         | -0.42        | -0.37        |
| Sural Velocity              | <b>-0.35</b> | -0.29       | -0.13 | 0.03         | -0.09        | 0.19         | .6    | -0.30        | 0.02         | <b>-0.35</b> | -0.21        |
| Peroneal Distal Latency     | <b>0.23</b>  | 0.12        | -0.04 | -0.05        | 0.13         | -0.14        | -0.07 | 0.10         | 0.05         | 0.21         | 0.18         |
| <b>Sensory Testing</b>      |              |             |       |              |              |              |       |              |              |              |              |
| Monofilament Right          | 1            | 0.43        | 0.32  | -0.12        | -0.12        | -0.41        | -0.11 | 0.33         | 0.14         | 0.48         | 0.47         |
| Vibration Detection Toe     | 0.43         | 1           | 0.40  | -0.22        | -0.19        | -0.37        | -0.01 | 0.25         | 0.10         | <b>0.45</b>  | 0.18         |
| Vibration Detection Hand    | 0.32         | <b>0.40</b> | 1     | -0.09        | -0.07        | -0.32        | 0.03  | 0.15         | 0.05         | 0.30         | 0.22         |
| Cold-Pain Foot              | -0.12        | -0.22       | -0.09 | 1            | 0.53         | 0.30         | 0.01  | -0.53        | <b>-0.56</b> | -0.14        | -0.13        |
| Cold-Pain Hand              | -0.12        | -0.19       | -0.07 | 0.53         | 1            | 0.15         | 0.04  | -0.27        | <b>-0.59</b> | 0.01         | -0.15        |
| Cold Detection Foot         | -0.41        | -0.37       | -0.32 | 0.30         | 0.15         | 1            | 0.29  | -0.35        | -0.20        | -0.51        | <b>-0.55</b> |
| Cold Detection Hand         | -0.11        | -0.01       | 0.03  | 0.01         | 0.04         | <b>0.29</b>  | 1     | -0.13        | -0.09        | -0.17        | <b>-0.29</b> |
| Heat-Pain Foot              | 0.33         | 0.25        | 0.15  | <b>-0.53</b> | -0.27        | -0.35        | -0.13 | 1            | 0.46         | 0.47         | 0.24         |
| Heat-Pain Hand              | 0.14         | 0.10        | 0.05  | -0.56        | <b>-0.59</b> | -0.20        | -0.09 | 0.46         | 1            | 0.12         | 0.29         |
| Heat Detection Foot         | <b>0.48</b>  | 0.45        | 0.30  | -0.14        | 0.01         | -0.51        | -0.17 | 0.47         | .012         | 1            | .042         |
| Heat Detection Hand         | 0.47         | 0.18        | 0.22  | -0.13        | -0.15        | <b>-0.55</b> | -0.29 | 0.24         | 0.29         | 0.42         | 1            |
| <b>Cutaneous Blood Flow</b> |              |             |       |              |              |              |       |              |              |              |              |
| Direct Blood Flow Arm       | -0.18        | -0.18       | -0.09 | 0.14         | 0.10         | 0.15         | 0.16  | -0.10        | -0.20        | -0.15        | <b>-0.23</b> |
| Direct Blood Flow Leg       | -0.16        | -0.07       | -0.04 | 0.08         | 0.11         | 0.03         | 0.07  | -0.20        | -0.04        | <b>-0.25</b> | -0.11        |
| Axon Reflex Blood Flow Arm  | -0.03        | -0.08       | -0.07 | -0.07        | -0.10        | <b>0.13</b>  | 0.04  | 0.02         | 0.11         | -0.10        | -0.04        |
| Axon Reflex Blood Flow Leg  | -0.19*       | -0.11       | -0.09 | 0.09         | 0.04         | 0.10         | 0.04  | <b>-0.29</b> | -0.07        | -0.21        | -0.14        |

This table highlights the relationships within and between the different testing modalities compared to sensory testing. The largest correlation in each row is shown in bold. Monofilament on the right (MLF), vibration detection at the toe (VT), vibration detection at the hand (VH), cold-pain detection at the foot (CPF), cold-pain detection at the hand (CPH), Cold detection at the foot (CF), heat-pain detection at the foot (HPF), heat-pain detection at the hand (HPH), heat detection at the foot (HF), heat detection at the hand (HH).

**Online Appendix Table 4: Correlations with Cutaneous Blood Flow**

|                               | Direct<br>Arm | Direct<br>Leg | Indirect<br>Arm | Indirect<br>Leg |
|-------------------------------|---------------|---------------|-----------------|-----------------|
| <b>Autonomic Tests</b>        |               |               |                 |                 |
| Phase 2 Valsalva BP           | 0.03          | <b>0.21</b>   | 0.01            | 0.11            |
| Valsalva Ratio                | 0.22          | <b>0.28</b>   | 0.01            | 0.27            |
| 0.15                          | 0.15          | 0.16          | 0.03            | 0.14            |
| Phase 4 Valsalva BP           | 0.05          | 0.10          | 0.11            | 0.10            |
| Fall in SBP on Tilt           | -0.18         | -0.09         | -0.03           | -0.11           |
| Fall in DBP on Tilt           | -0.12         | -0.10         | -0.04           | -0.12           |
| <b>Nerve Conductions</b>      |               |               |                 |                 |
| Peroneal Amplitude            | 0.13          | 0.23          | 0.01            | <b>0.25</b>     |
| Peroneal Velocity             | 0.17          | 0.17          | 0.09            | <b>0.19</b>     |
| Sural Amplitude               | <b>0.33</b>   | 0.19          | 0.11            | 0.24            |
| Sural Velocity                | <b>0.23</b>   | 0.12          | .015            | 0.17            |
| Peroneal Distal Latency       | -0.10         | -0.03         | -0.11           | -0.09           |
| <b>Sensory Testing</b>        |               |               |                 |                 |
| Monofilament Right            | -0.18         | -0.16         | -0.03           | <b>-0.19</b>    |
| Vibration Detection Toe       | <b>-0.18</b>  | -0.06         | -0.08           | -0.11           |
| Vibration Detection Hand      | <b>-0.09</b>  | -0.04         | -0.07           | <b>-0.09</b>    |
| Cold-Pain Foot                | <b>0.14</b>   | 0.08          | -0.07           | 0.09            |
| Cold-Pain Hand                | 0.10          | <b>0.11</b>   | -0.10           | 0.05            |
| Cold Detection Foot           | <b>0.15</b>   | 0.03          | 0.13            | 0.10            |
| Cold Detection Hand           | <b>0.16</b>   | 0.07          | 0.04            | 0.04            |
| Heat-Pain Foot                | -0.10         | -0.20         | 0.02            | <b>-0.29</b>    |
| Heat-Pain Hand                | <b>-0.20</b>  | -0.04         | 0.11            | -0.07           |
| Heat Detection Foot           | -0.15         | <b>-0.25</b>  | -0.10           | -0.21           |
| Heat Detection Hand           | <b>-0.23</b>  | -0.11         | -0.04           | -0.14           |
| <b>Cutaneous Blood Flow</b>   |               |               |                 |                 |
| Direct Blood Flow Arm         | 1             | <b>0.21</b>   | 0.04            | 0.17            |
| Direct Blood Flow Leg         | 0.21          | 1             | 0.09            | <b>0.34</b>     |
| Axon Reflex Blood Flow<br>Arm | 0.04          | 0.09          | 1               | <b>0.12</b>     |
| Axon Reflex Blood Flow<br>Leg | 0.17          | <b>0.34</b>   | 0.12            | 1               |

This table highlights the relationships within and between the different testing modalities compared to laser-Doppler flowmetry. The cutaneous direct (endothelial dependent) blood flow is measured at the arm and the leg. Indirect (axon reflex mediation, or endothelial independent) blood flow is measured at the arm and leg. The largest correlation in each row is shown in bold. \*=P<0.05, \*\*=P<0.01.
